# Supplementary material
Source: Elsevier journal article supplement (https://www.sciencedirect.com/science/article/pii/S0870255122004607)
Supplement: mmc1 [file S0870255122004607:mmc1.doc]

**Supplementary Material**

**S1 - Main traditional risk factors and coronary artery disease prediction**

**
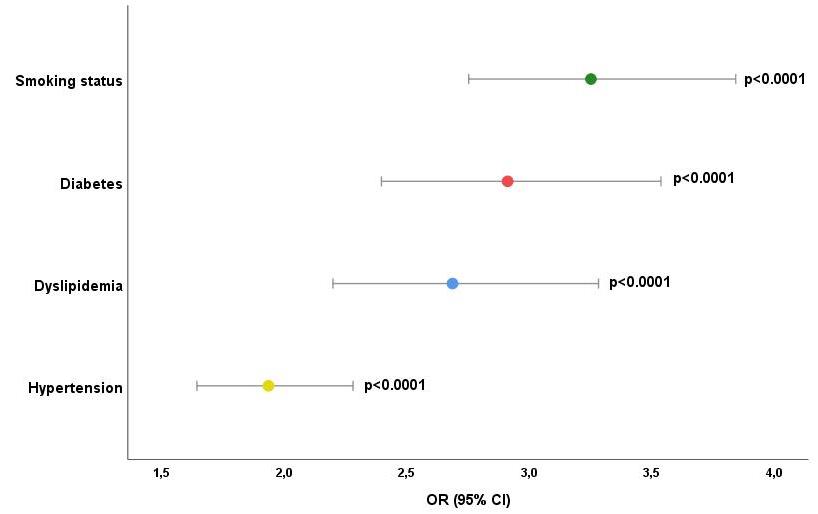
**

**S2 - Genetics models and respective odds ratio in the GENEMACOR population**

| **Genetic variants** | | **Cases** | **Controls** | **Models** | | | |
| --- | --- | --- | --- | --- | --- | --- | --- |
| **(n=1723)** | **(n=1416)** | **Dominant** | **Recessive** | **Additive** | **Allelic** |
| ***LPA***  **rs3798220** | **TT** | 1634 (94.8) | 1380 (97.5) | ***2.088*** | ------ | ***1.445*** | ***2.059*** |
| **TC** | 89 (5.2) | 36 (2.5) | ***(1.408-3.095)*** | ***(1.187-1.759)*** | ***(1.394-3.042)*** |
| **CC** | 0 (0.0) | 0 (0.0) | ***p=0.0002*** | ***p<0.0001*** | ***p=0.0002*** |
| ***APOE* rs7412/rs429358** | **E2** | 1266 (73.5) | 1103 (77.9) | ***1.272*** | 1.317 | ***1.235*** | ***1.244*** |
| **E3** | 414 (24.0) | 286 (20.2) | ***(1.079-1.500)*** | (0.810-2.142) | ***(1.067-1.428)*** | ***(1.073-1.442)*** |
| **E4** | 43 (2.5) | 27 (1.9) | ***p=0.004*** | p=0.266 | ***p=0.005*** | ***p=0.004*** |
| ***ADIPOQ* rs266729** | **CC** | 982 (57.0) | 860 (60.7) | ***1.167*** | 1.224 | ***1.143*** | ***1.144*** |
| **CG** | 635 (36.9) | 484 (34.2) | ***(1.012-1.347)*** | (0.899-1.665) | ***(1.016-1.285)*** | ***(1.017-1.287)*** |
| **GG** | 106 (6.2) | 72 (5.1) | ***p=0.034*** | p=0.198 | ***p=0.026*** | ***p=0.025*** |
| ***FTO***  **rs8050136** | **CC** | 597 (34.6) | 545 (38.5) | ***1.180*** | 1.121 | ***1.118*** | ***1.118*** |
| **AC** | 842 (48.9) | 659 (46.5) | ***(1.020-1.366)*** | (0.924-1.360) | ***(1.010-1.238)*** | ***(1.010-1.238)*** |
| **AA** | 284 (16.5) | 212 (15.0) | ***p=0.026*** | p=0.248 | ***p=0.031*** | ***p=0.031*** |
| ***MTHFR* rs1801133** | **CC** | 726 (42.1) | 662 (46.8) | ***1.206*** | 1.113 | ***1.136*** | ***1.136*** |
| **CT** | 795 (46.1) | 603 (42.6) | ***(1.047-1.389)*** | (0.890-1.392) | ***(1.022-1.263)*** | ***(1.022-1.263)*** |
| **TT** | 202 (11.7) | 151 (10.7) | ***p=0.010*** | p=0.350 | ***p=0.018*** | ***p=0.018*** |
| ***PON1***  **rs854560** | **TT** | 578 (33.5) | 529 (37.4) | ***1.181*** | 1.164 | ***1.130*** | ***1.130*** |
| **TA** | 840 (48.8) | 666 (47.0) | ***(1.020-1.369)*** | (0.962-1.406) | ***(1.021-1.250)*** | ***(1.021-1.251)*** |
| **AA** | 305 (17.7) | 221 (15.6) | ***p=0.026*** | p=0.118 | ***p=0.018*** | ***p=0.018*** |
| ***TCF21* rs12190287** | **GG** | 164 (9.5) | 168 (11.9) | ***1.280*** | ***1.260*** | ***1.203*** | ***1.200*** |
| **CG** | 744 (43.2) | 659 (46.5) | ***(1.019-1.607)*** | ***(1.094-1.452)*** | ***(1.081-1.338)*** | ***(1.079-1.333)*** |
| **CC** | 815 (47.3) | 589 (41.6) | ***p=0.033*** | ***p=0.001*** | ***p=0.001*** | ***p=0.001*** |
| ***PHACTR1* rs1332844** | **CC** | 328 (19.0) | 299 (21.1) | 1.139 | ***1.201*** | ***1.128*** | ***1.129*** |
| **CT** | 830 (48.2) | 708 (50.0) | (0.955-1.357) | ***(1.031-1.400)*** | ***(1.021-1.246)*** | ***(1.021-1.248)*** |
| **TT** | 565 (32.8) | 409 (28.9) | p=0.147 | ***p=0.019*** | ***p=0.018*** | ***p=0.018*** |
| ***ZC3HC1* rs11556924** | **TT** | 181 (10.5) | 177 (12.5) | 1.217 | ***1.164*** | ***1.137*** | ***1.135*** |
| **TC** | 771 (44.7) | 658 (46.5) | (0.976-1.517) | ***(1.010-1.342)*** | ***(1.023-1.263)*** | ***(1.022-1.260)*** |
| **CC** | 771 (44.7) | 581 (41.0) | p=0.080 | ***p=0.036*** | ***p=0.017*** | ***p=0.018*** |
| ***CDKN2B-AS1* rs1333049** | **GG** | 351 (20.4) | 337 (23.8) | ***1.221*** | 1.164 | ***1.137*** | ***1.143*** |
| **CG** | 819 (47.5) | 670 (47.3) | ***(1.031-1.466)*** | (0.999-1.356) | ***(1.031-1.254)*** | ***(1.035-1.263)*** |
| **CC** | 553 (32.1) | 409 (28.9) | ***p=0.021*** | p=0.052 | ***p=0.010*** | ***p=0.009*** |
| ***CDKN2B-AS1* rs4977574** | **AA** | 301 (17.5) | 296 (20.9) | ***1.249*** | ***1.184*** | ***1.151*** | ***1.161*** |
| **AG** | 784 (45.5) | 650 (45.9) | ***(1.044-1.493)*** | ***(1.021-1.372)*** | ***(1.044-1.270)*** | ***(1.050-1.284)*** |
| **GG** | 638 (37.0) | 470 (33.2) | ***p=0.015*** | ***p=0.025*** | ***p=0.005*** | ***p=0.004*** |

*The gray cells highlight the statistically significant genetic models (p<0.05)*
